# Supplementary material for: Accelerated thermal reaction kinetics by indirect microwave heating of a microwave-transparent substrate
Source: Royal Society of Chemistry journal article supplement (doi:10.1039/d1cp04883j), 2022-01-01
Supplement: d1cp04883j1.pdf [file d1cp04883j1.pdf]

## Supporting information

### **Accelerated thermal reaction kinetics by indirect microwave heating of a microwave-transparent substrate**

Amir Tavakoli,<sup>†</sup> A. E. Stiegman,<sup>‡</sup> and Gregory B. Dudley<sup>\*,†</sup>

<sup>†</sup>C. Eugene Bennett Department of Chemistry, West Virginia University, Morgantown, WV 26505, USA

<sup>‡</sup>Department of Chemistry and Biochemistry, Florida State University, Tallahassee, FL 32306, USA

#### **List of contents:**

|                                                                                           |     |
|-------------------------------------------------------------------------------------------|-----|
| 1. Aggregation of pNA in mesitylene.....                                                  | S1  |
| 2. Procedures for Microwave and Conventional Heating Experiments .....                    | S2  |
| 3. General Procedure for Conventional Heating Kinetic Experiments.....                    | S5  |
| 4. Table of Conventional heating experiments .....                                        | S7  |
| 5. Samples of <sup>1</sup> H NMR spectra for qNMR analysis.....                           | S11 |
| 6. Conventional heating in absence of pNA.....                                            | S16 |
| 7. General Procedure for Microwave Heating Experiments.....                               | S17 |
| 8. Table of Microwave pulsed heating experiments under closed vessel condition....        | S18 |
| 9. Sample of Excel work.....                                                              | S19 |
| 10. Calculation of $k_{\text{eff}}/k_{\text{CH}}$ and $k_{\text{MW}}/k_{\text{CH}}$ ..... | S22 |
| 11. Microwave pulsed heating experiments under open vessel condition.....                 | S23 |
| 12. Fixed power microwave experiments.....                                                | S24 |

### Aggregation of pNA in mesitylene:

We observed formation of brown particles in the solution A after sitting overnight; pure pNA has a soft beige color. These particulates redissolved within a few seconds of stirring at room temperature (Figure S1), with solution A remaining macroscopically homogeneous throughout the high-temperature aryl Claisen rearrangement experiments.

**Figure S1.** Agglomerate formation in solution A

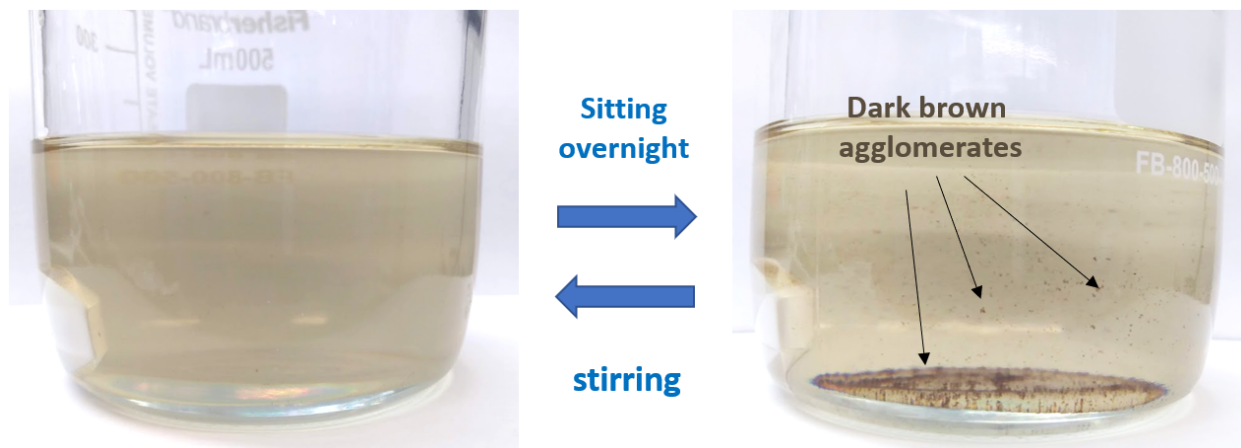

## Procedures for Microwave and Conventional Heating Experiments

Microwave experiments were carried out in a CEM Discover SP system equipped with a fiber optic temperature control assembly. The temperatures were monitored using the fiber optic probe, with the probe inserted into the reaction mixture in a sapphire thermowell. This option allows for measuring the internal temperature up to 250°C. The reactor has a self-tuning, single-mode cavity, which allows for focused and consistent wattages to be supplied while eliminating any positional sensitivity or reflected power issues. The reactor is capable of supplying constant power in 1 W increments from 0 to 300 W. It has an automated power control so that a constant reaction temperature can be automatically maintained throughout the reaction. The microwave is equipped with an active air-cooling system that can be used to remove heat from the sample by constant flow of air in a controlled manner. The reactor is also capable of doing dynamic power cycling, whereby cycling between a specified high and low temperature can be performed at a fixed power. In this configuration, the power is on during the heating phase of the cycle and off during the cooling phase of the cycle. The reaction vessel used for our experiment was a 10 mL quartz tube. A quartz vessel was used because it absorbs very little microwave radiation.

Conventional experiments were performed in a pre-heated insulated silicon oil bath at desired temperatures set by an external fiber optic probe which was verified to be consistent with the microwave fiber optic probe (see Table S1). All reactions were performed in oven-dried 10 mL reaction vessels. Aliquots (0.2 mL) were taken immediately following the reaction period followed by dissolving in CDCl<sub>3</sub> (0.40 mL) for <sup>1</sup>H NMR analysis. Baselines in all NMRs were corrected using full auto (Whittaker Smoother) prior to integration to ensure consistent results. The methylene peak of diphenylmethane (internal standard) and allylic protons of ANE were used for monitoring reaction progress.

To make sure that the temperature readings are consistent in MW and CH condition, both fiber optic probes were inserted into a preheated oil bath at 160 °C (Figure S2). The oil bath was allowed to cool down while recoding the temperatures of both instruments (Table S1).

**Figure S2.** Experiment setup for measuring temperature of an oil bath cooling from 160 °C using fiber optic probes of CEM MW instrument and yellow fiber optic used for conventional heating experiments.

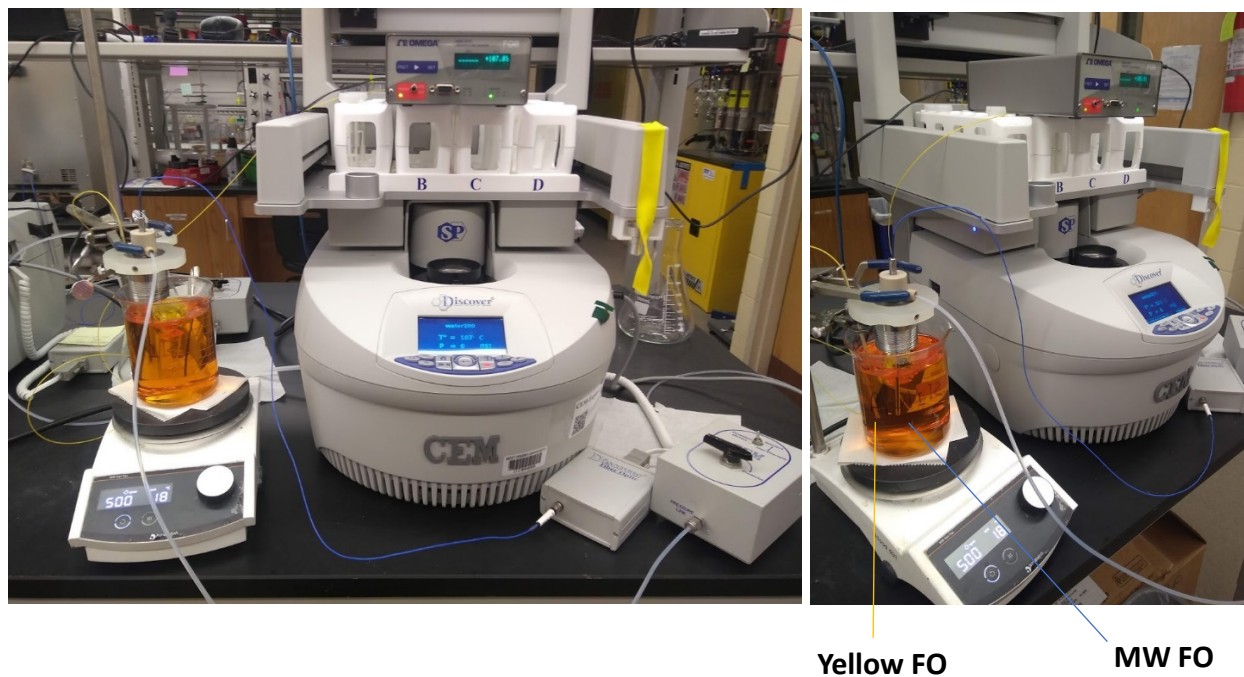

**Table S1.** Temperature readings of MW and CH fiber optic instruments

| MW FO temp (°C) | CH FO temp range (°C) |   |       | MW FO temp (°C) | CH FO temp range (°C) |   |       |
|-----------------|-----------------------|---|-------|-----------------|-----------------------|---|-------|
| 160             | 160.3                 | - | 159.3 | 139             | 139.3                 | - | 138.5 |
| 159             | 159.3                 | - | 158.3 | 138             | 138.5                 | - | 137.2 |
| 158             | 158.3                 | - | 157.3 | 137             | 137.2                 | - | 136.4 |
| 157             | 157.3                 | - | 156.2 | 136             | 136.4                 | - | 135.5 |
| 156             | 156.2                 | - | 155.3 | 135             | 135.5                 | - | 134.4 |
| 155             | 155.3                 | - | 154.1 | 134             | 134.4                 | - | 133.5 |
| 154             | 154.1                 | - | 153.1 | 133             | 133.5                 | - | 132.2 |
| 153             | 153.1                 | - | 152.2 | 132             | 132.2                 | - | 131.4 |
| 152             | 152.2                 | - | 151.2 | 131             | 131.4                 | - | 130.4 |
| 151             | 151.2                 | - | 150.2 | 130             | 130.4                 | - | 129.4 |
| 150             | 150.2                 | - | 149.3 | 129             | 129.4                 | - | 128.4 |
| 149             | 149.3                 | - | 148.2 | 128             | 128.4                 | - | 127.4 |
| 148             | 148.2                 | - | 147.2 | 127             | 127.4                 | - | 127.4 |
| 147             | 147.2                 | - | 146.4 | 126             | 127.4                 | - | 126.4 |
| 146             | 146.4                 | - | 145.2 | 125             | 126.4                 | - | 125.5 |
| 145             | 145.2                 | - | 144.3 | 124             | 125.5                 | - | 124.5 |
| 144             | 144.3                 | - | 143.1 | 123             | 124.5                 | - | 123.5 |
| 143             | 143.1                 | - | 142.3 | 122             | 123.5                 | - | 122.5 |
| 142             | 142.3                 | - | 141.4 | 121             | 122.5                 | - | 121.5 |
| 141             | 141.4                 | - | 140.2 | 120             | 121.5                 | - | 120.5 |
| 140             | 140.2                 | - | 139.3 |                 |                       |   |       |

## General Procedure for Conventional Heating Kinetic Experiments

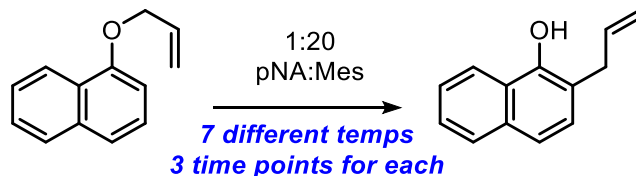

To obtain the kinetic data, the thermal reaction of ANE in 1:20 pNA:Mes was carried out in silicon oil bath, heated on a temperature controlled Heidolph hotplate with the temperature controlled to within  $\pm 1$  °C by an integrated controller. The precise reaction temperatures (within  $\pm 0.1$  °C) were measured by an external fiber optic probe. Kinetic data was collected for seven different temperatures between 130 and 160 °C in 5 °C increments over a period of 3 hours for four higher temperatures, and 5 hours for the lower ones. At each temperature, three identical samples containing 3.0 mL of solution A were first preheated at 100 °C for 10 minutes before they were inserted into the oil bath, which had been preheated to the desired temperature. It was confirmed that during this time, there was not any observable conversion. In all cases, ramping times to reach the desired temperatures were decreased to less than 5 minutes. Once each experiment was finished, the hot tubes were immediately submerged into a cold water bath to terminate the thermal reaction. This process was performed for three reaction times for each temperature and kinetic data were obtained as follows.

Conversion yields were obtained by quantitative NMR analysis and the average values were used to determine the starting material concentration (Table S2).  $^1\text{H}$  NMR spectra of the stock solution A and 3 samples at 150 °C after 1, 2, 3h of heating are illustrated in Figure S5. Kinetic plots of the time dependent concentration data collected at different temperatures are shown in Figures S3 (combined) and S4 (separate). The average rate constants obtained from linear squares fit of the linearized data ( $\text{Ln}(\text{ANE})$  vs time) are given in Table S3.

Figure S3.

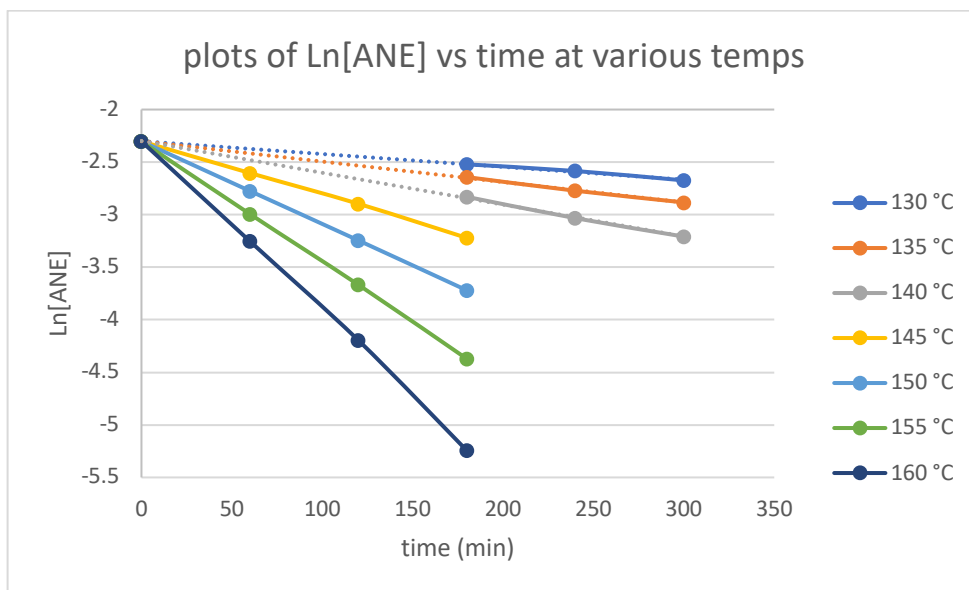

**Table S2.** change of concentration over time at various temps

|                                      | Duration (min) |                   | Heating Temp (°C) |                   |                   |                   |                   |                   |                   |
|--------------------------------------|----------------|-------------------|-------------------|-------------------|-------------------|-------------------|-------------------|-------------------|-------------------|
|                                      |                |                   | 129.8<br>± 0.1    | 134.6<br>± 0.1    | 139.6<br>± 0.1    | 145.2<br>± 0.1    | 149.9<br>± 0.1    | 155.1<br>± 0.1    | 160.0<br>± 0.1    |
| <b>[ANE]<br/>(×10<sup>-3</sup>M)</b> | 0              |                   | 100.0             | 100.0             | 100.0             | 100.0             | 100.0             | 100.0             | 100.0             |
|                                      | 60             | 1                 | -                 | -                 | -                 | 73.61             | 62.27             | 49.57             | 37.65             |
|                                      |                | 2                 | -                 | -                 | -                 | 74.48             | 61.97             | 50.36             | 38.53             |
|                                      |                | 3                 | -                 | -                 | -                 | 73.82             | 62.86             | 50.28             | 39.75             |
|                                      |                | Ave<br>(± σ)      | -                 | -                 | -                 | 73.97<br>(± 0.37) | 62.37<br>(± 0.37) | 50.07<br>(± 0.36) | 38.64<br>(± 0.86) |
|                                      |                | 120               | 1                 | -                 | -                 | -                 | 54.69             | 38.44             | 25.54             |
|                                      | 2              |                   | -                 | -                 | -                 | 55.34             | 39.85             | 25.56             | 12.37             |
|                                      | 3              |                   | -                 | -                 | -                 | 55.64             | 38.60             | 25.53             | 15.31             |
|                                      | Ave<br>(± σ)   |                   | -                 | -                 | -                 | 55.22<br>(± 0.39) | 38.96<br>(± 0.63) | 25.54<br>(± 0.01) | 13.23<br>(± 0.20) |
|                                      | 180            | 1                 | 80.23             | 71.01             | 59.25             | 39.92             | 24.30             | 12.5              | 5.330             |
|                                      |                | 2                 | 80.51             | 71.31             | 59.58             | 39.89             | 24.26             | 12.70             | 5.055             |
|                                      |                | 3                 | 80.27             | 71.12             | 58.12             | 39.86             | 24.12             | 12.67             | 5.430             |
|                                      |                | Ave<br>(± σ)      | 80.34<br>(± 0.12) | 71.17<br>(± 0.12) | 58.98<br>(± 0.62) | 39.89<br>(± 0.02) | 24.23<br>(± 0.08) | 12.62<br>(± 0.09) | 5.272<br>(± 0.16) |
|                                      | 240            | 1                 | 75.92             | 62.01             | 49.24             | -                 | -                 | -                 | -                 |
|                                      |                | 2                 | 75.53             | 63.33             | 48.11             | -                 | -                 | -                 | -                 |
|                                      |                | 3                 | 74.80             | 62.20             | 47.11             | -                 | -                 | -                 | -                 |
|                                      |                | Ave<br>(± σ)      | 75.42<br>(± 0.46) | 62.51<br>(± 0.58) | 48.15<br>(± 0.87) | -                 | -                 | -                 | -                 |
|                                      | 300            | 1                 | 68.79             | 55.49             | 40.48             | -                 | -                 | -                 | -                 |
|                                      |                | 2                 | 68.97             | 55.67             | 40.35             | -                 | -                 | -                 | -                 |
|                                      |                | 3                 | 69.13             | 56.64             | 40.40             | -                 | -                 | -                 | -                 |
| Ave<br>(± σ)                         |                | 68.96<br>(± 0.14) | 55.93<br>(± 0.50) | 40.41<br>(± 0.05) | -                 | -                 | -                 | -                 |                   |



Figure S4. Plots of Ln[ANE] against time to obtain rate constants at various temps

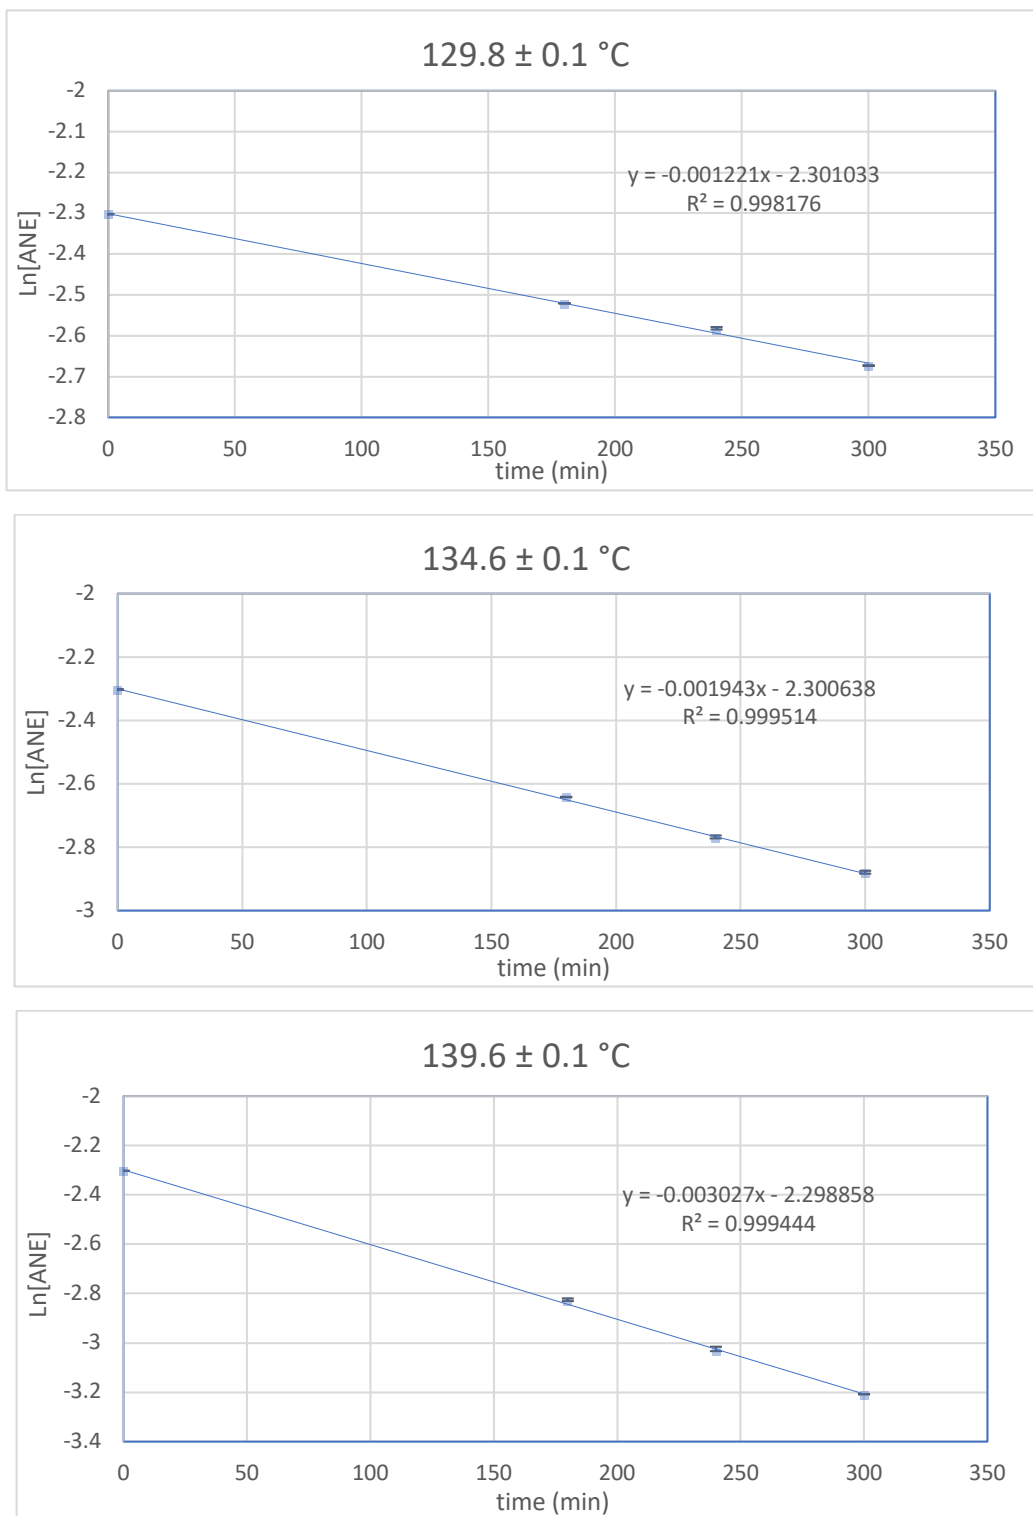

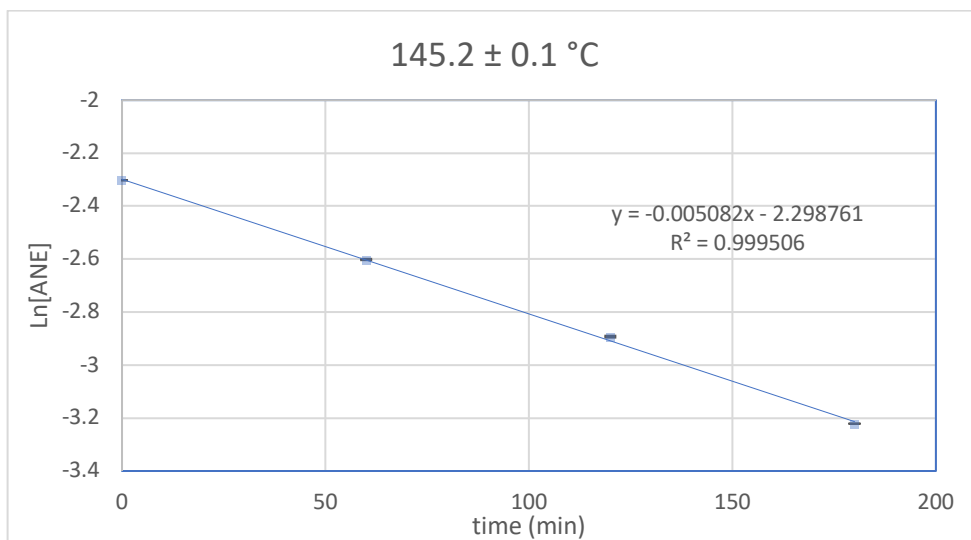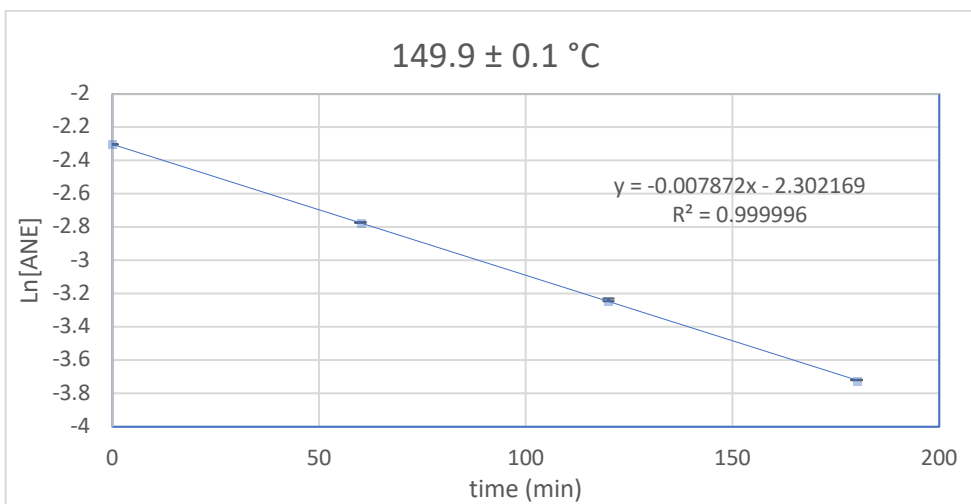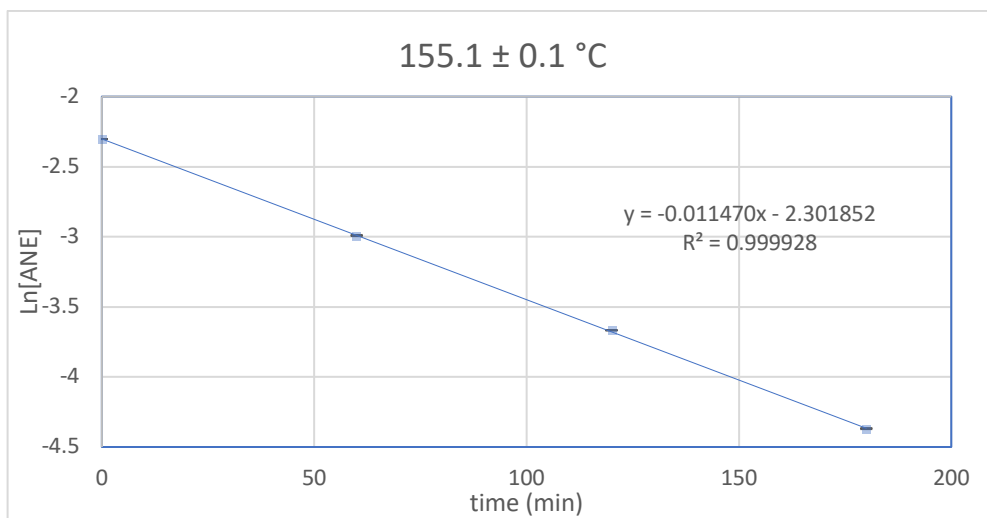

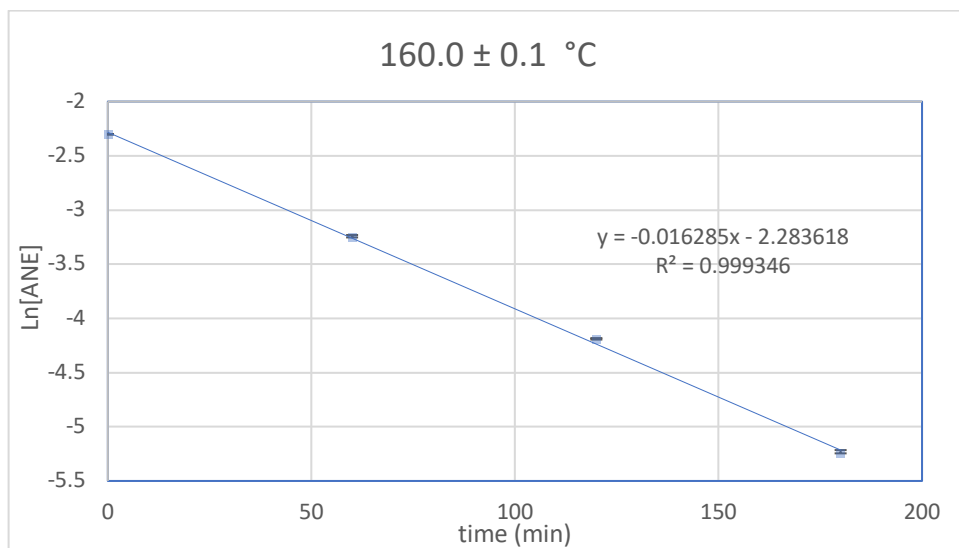

**Table S3.** Average rate constants at various temps

| Temp (°C)  | $k$ ( $\times 10^{-3}$ ) ( $\text{min}^{-1}$ ) | $R^2$      | Std. Dev ( $\times 10^{-3}$ ) | 95% Confidence Interval ( $\times 10^{-3}$ ) |
|------------|------------------------------------------------|------------|-------------------------------|----------------------------------------------|
| <b>130</b> | 1.220                                          | 0.99817636 | 0.037                         | 0.036                                        |
| <b>135</b> | 1.942                                          | 0.99951432 | 0.030                         | 0.029                                        |
| <b>140</b> | 3.027                                          | 0.99944405 | 0.050                         | 0.049                                        |
| <b>145</b> | 5.082                                          | 0.99950576 | 0.080                         | 0.078                                        |
| <b>150</b> | 7.872                                          | 0.99999619 | 0.011                         | 0.010                                        |
| <b>155</b> | 11.47                                          | 0.99992821 | 0.07                          | 0.07                                         |
| <b>160</b> | 16.28                                          | 0.99934588 | 0.29                          | 0.29                                         |

**Figure S5.** Samples of  $^1\text{H}$  NMR spectra for: a) stock solution A; solutions after b) 1h; c) 2h; and d) 3h at 150 °C in oil bath

a)

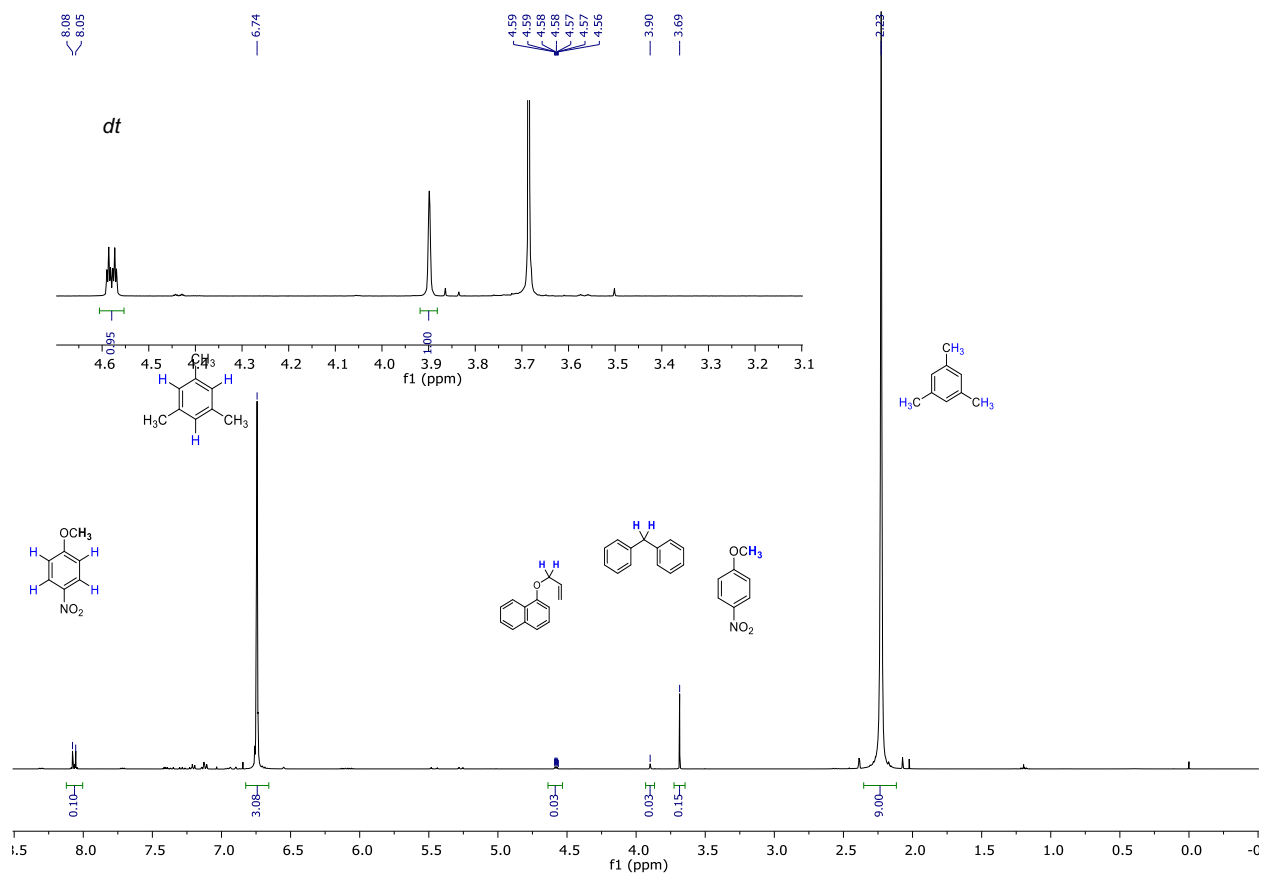

b)

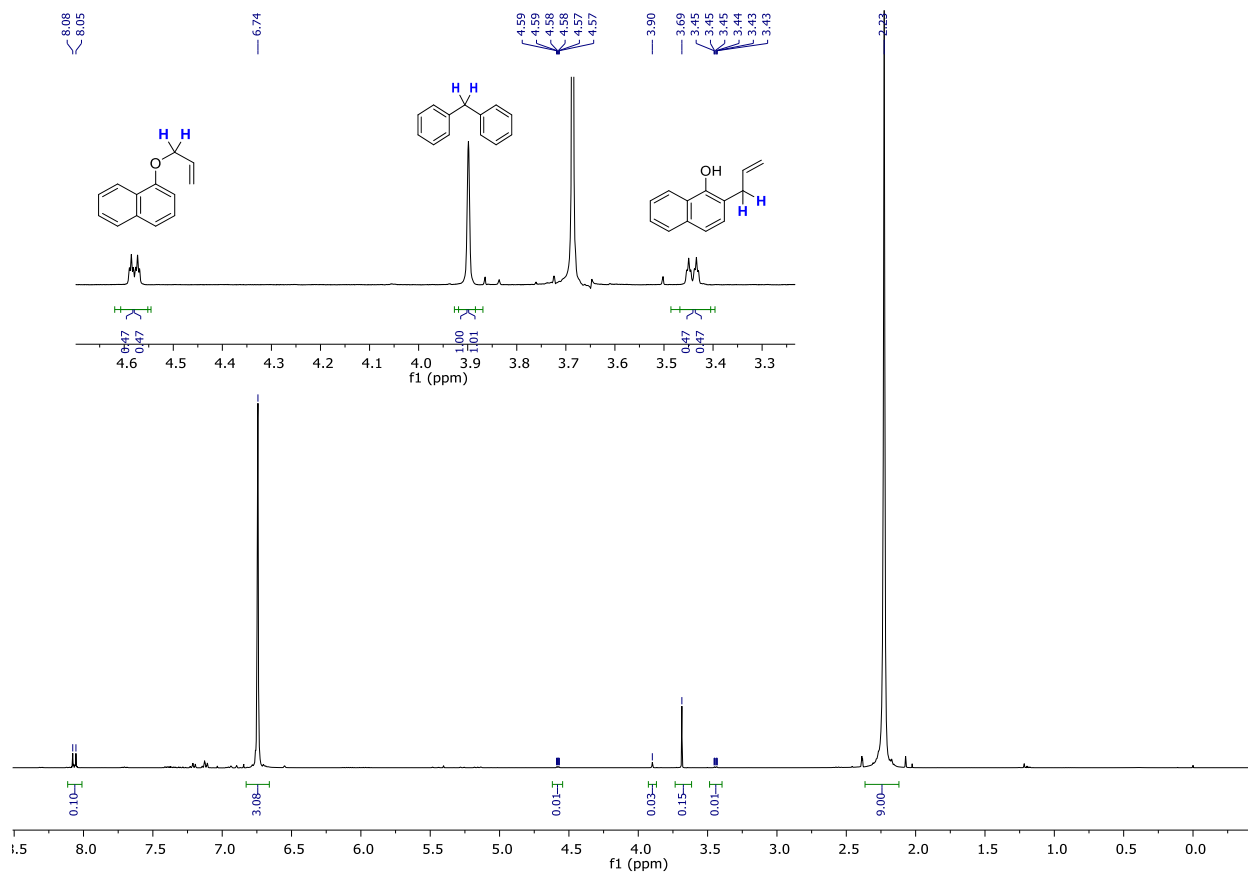

c)

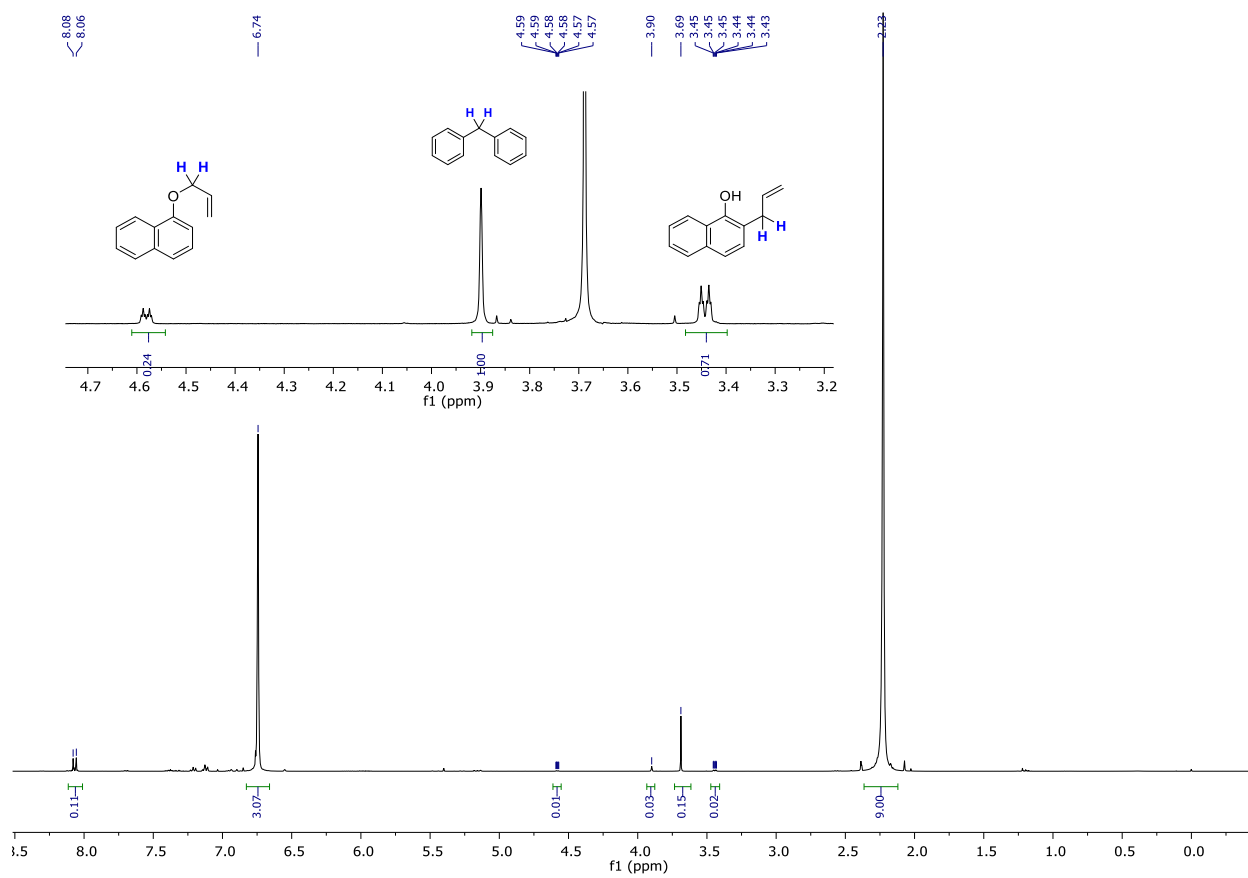

d)

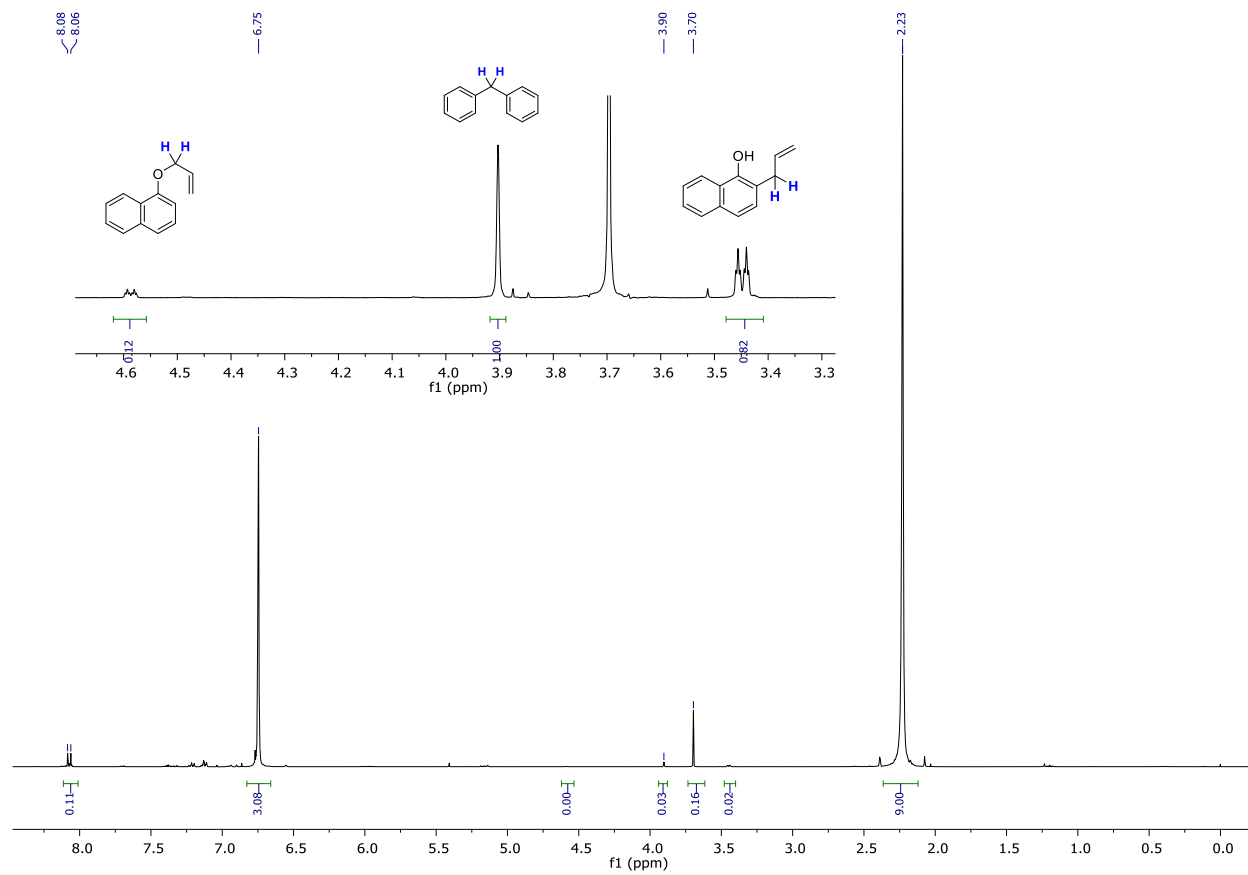

Finally, the natural logs of the average rate constants at each temperature were plotted against inverse absolute temperatures to obtain activation energy and exponential factor of the Arrhenius equation. (Figure S6 and Table S4)

**Figure S6.** Plot of logarithmic rate constants versus  $T^{-1}$

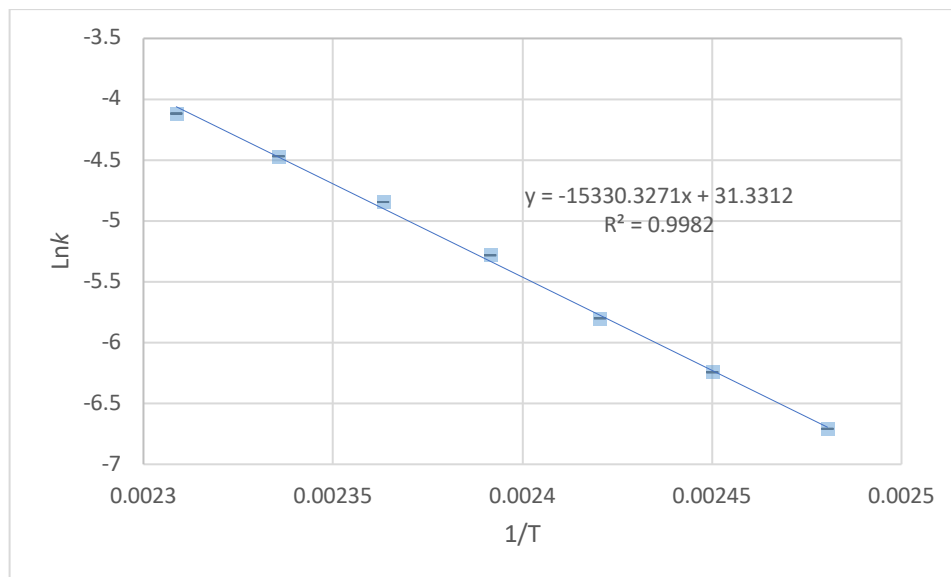

**Table S4.** Least square results for Arrhenius analysis of ANE rearrangement

|                      | quantity                                       | Std. dev.                                      | 95%<br>Conf. Interval | R <sup>2</sup> |
|----------------------|------------------------------------------------|------------------------------------------------|-----------------------|----------------|
| Slope                | -15330.33                                      | 287.45                                         | 212.94                | 0.998245       |
| Intercept            | 31.33                                          | 0.69                                           | 0.51                  |                |
| <b>E<sub>a</sub></b> | <b>127.46 kJ.mol<sup>-1</sup></b>              | <b>2.39 kJ.mol<sup>-1</sup></b>                |                       |                |
| <b>A</b>             | <b>4.05 × 10<sup>13</sup> min<sup>-1</sup></b> | <b>3.01 × 10<sup>13</sup> min<sup>-1</sup></b> |                       |                |



**Conventional heating in absence of pNA:**

**Table S5.** conversion yields and rate constants for two sets of experiments at 140 and 150 °C in absence of pNA in oil bath.

| Temp (°C) | Conversion yields (%) |         |         |         | $k$ ( $\times 10^{-3}$ ) ( $\text{min}^{-1}$ ) |
|-----------|-----------------------|---------|---------|---------|------------------------------------------------|
| 150       | 60 min                | 120 min | 180 min | 240 min | 7.033                                          |
|           | 33.09                 | 55.86   | 73.14   | 80.86   |                                                |
| 140       | 60 min                | 120 min | 240 min | 300 min | 2.987                                          |
|           | 14.34                 | 27.37   | 49.87   | 59.07   |                                                |

**Figure S7.** Plots of  $\text{Ln}[\text{ANE}]$  against time in absence of pNA at a) 140 °C; b) 150 °C

a)

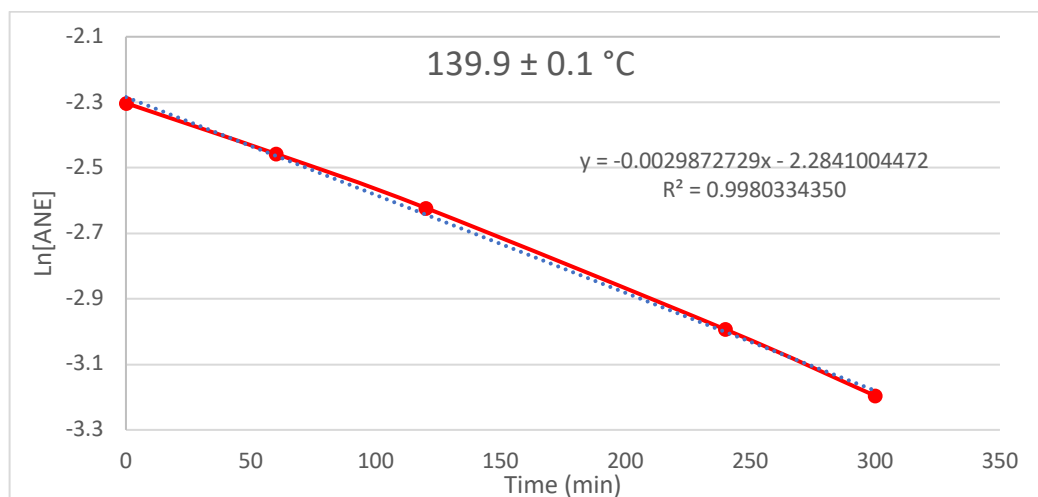

b)

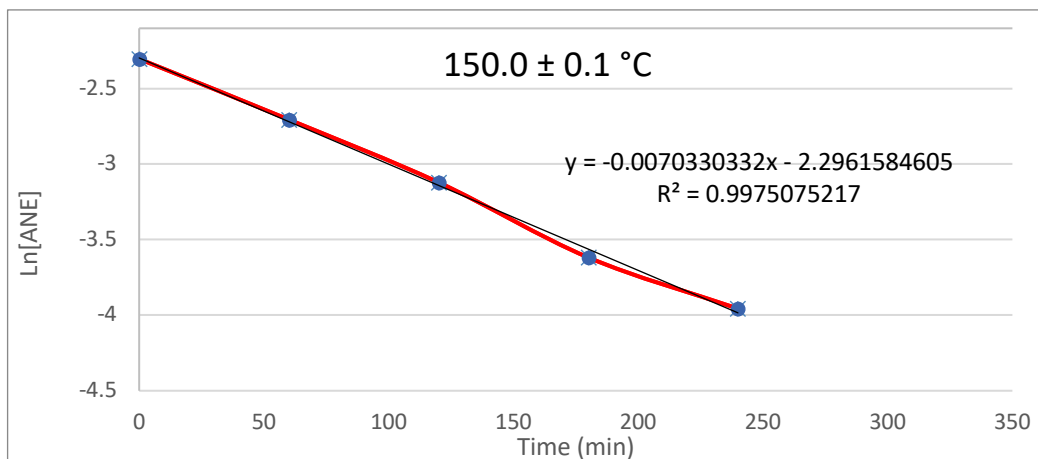

## General Procedure for Microwave Heating Experiments

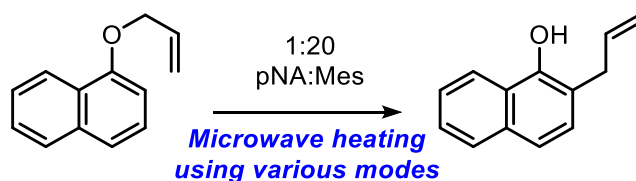

Microwave experiments were conducted using pulsed heating and fixed temperature modes. For closed vessel experiments, identical samples containing 3.0 mL of solution A, and for open vessel experiments, 30 mL samples were prepared. In each experiment, predicted conversion yield was calculated by determining the extent of the reaction that would be expected if the same temperature profile were produced using thermal pulses, following the kinetic data. This was done by calculating the expected extent of thermal conversion for every second of the experiment and then summing over the total number of seconds to produce an expected thermal conversion and an integrated average temperature or so-called “effective temperatures”.

$$k_n = Ae^{-E_a/RT_n}$$
$$[\text{ANE}]_n = \text{concentration of ANE at } t = n;$$
$$\ln[\text{ANE}]_n = \ln[\text{ANE}]_{n-1} - k_n(t_n - t_{n-1})$$
$$\text{since } t_n - t_{n-1} = 1$$
$$\ln[\text{ANE}]_n - \ln[\text{ANE}]_{n-1} = -k_n = -Ae^{-E_a/RT_n}$$
$$\ln(1 - 0.01x) = -\sum_{n=1}^f Ae^{-E_a/RT_n}$$

x = conversion yield (%)

### Pulsed heating microwave experiments:

Pulsed heating experiments were performed in various temperature ranges, amounts of applied power, and number of cycles. The maximum number of cycles and applied power available in the CEM instrument are 300 cycles and 300W respectively. The lower value in the temperature ranges for all experiments were set to 50 °C while the higher value varied from 130 to 150 °C. To investigate the effect of power, three different amounts of fixed power were applied: 50, 100, and 300W. For 900 cycles, the experiment was repeated twice after the first run. Results are summarized in Table S6.

**Table S6.** Results of microwave pulsed heating experiments under closed vessel condition

| Entry |   | Temp. Range (°C) | Power (W) | Duration (mins) | Number of Cycles | Min-Max Temp (°C) | Ave Temp (°C) | Actual yield (%) | Predicted yield (%) | Actual – Predicted (%) | $k_{ref}/k_{CH}$ | $k_{MW}/k_{CH}$ |
|-------|---|------------------|-----------|-----------------|------------------|-------------------|---------------|------------------|---------------------|------------------------|------------------|-----------------|
| 1     | a | 50-130           | 300       | 639.2           | 300              | 49 – 137          | 86.44         | 21.01            | 15.80               | 5.21                   | 1.371            | 3.054           |
|       | b | 50-130           | 300       | 654.8           | 300              | 49 – 137          | 86.66         | 22.84            | 16.24               | 6.60                   | 1.463            | 3.514           |
|       | c | 50-130           | 300       | 650.3           | 300              | 49 – 137          | 86.37         | 21.78            | 15.85               | 5.93                   | 1.423            | 3.268           |
| 2     | a | 50-130           | 100       | 883.2           | 300              | 48 – 131          | 90.57         | 24.31            | 18.43               | 5.88                   | 1.367            | 1.649           |
|       | b | 50-130           | 100       | 911.2           | 300              | 48 – 131          | 90.31         | 21.61            | 18.93               | 2.68                   | 1.160            | 1.295           |
| 3     | a | 50-130           | 50        | 1529.7          | 300              | 48 – 130          | 96.34         | 40.79            | 34.68               | 6.11                   | 1.231            | 1.274           |
|       | b | 50-130           | 50        | 1502.4          | 300              | 48 – 130          | 95.87         | 41.12            | 33.50               | 7.62                   | 1.298            | 1.362           |
| 4     | a | 50-130           | 300       | 1957.3          | 900              | 49 – 137          | 86.79         | 57.34            | 41.76               | 15.58                  | 1.576            | 3.539           |
|       | b | 50-130           | 300       | 1954.3          | 900              | 49 – 137          | 87.02         | 59.67            | 42.48               | 17.19                  | 1.642            | 3.856           |
|       | c | 50-130           | 300       | 1932.5          | 900              | 49 – 137          | 86.59         | 53.89            | 40.64               | 13.25                  | 1.484            | 3.178           |
| 5     | a | 50-140           | 300       | 714.2           | 300              | 49 – 146          | 90.37         | 44.67            | 33.40               | 11.27                  | 1.456            | 2.695           |
|       | b | 50-140           | 300       | 698.1           | 300              | 49 – 146          | 90.38         | 40.52            | 32.64               | 7.88                   | 1.315            | 2.181           |
|       | c | 50-140           | 300       | 723.0           | 300              | 49 – 146          | 90.41         | 43.84            | 33.67               | 10.17                  | 1.405            | 2.490           |
| 6     | a | 50-150           | 300       | 775.8           | 300              | 49 – 155          | 94.37         | 69.87            | 60.19               | 9.68                   | 1.302            | 1.683           |
|       | b | 50-150           | 300       | 783.0           | 300              | 49 – 155          | 94.63         | 69.44            | 60.86               | 8.58                   | 1.264            | 1.598           |
|       | c | 50-150           | 300       | 783.9           | 300              | 49 – 155          | 94.67         | 71.14            | 61.14               | 10.00                  | 1.315            | 1.689           |

### A sample of Excel work to obtain predicted yields using temperature profile:

Here we show the method used for determining each predicted conversion yield for microwave experiments. To simplify the process, only 130 data points over 130 seconds of the experiment are shown in Table S7. During this time, one cycle of heating and cooling is completed.

**Table S7. Excel work for the first 130 seconds of a pulsed heating microwave experiment**

| Column D formula = $4.05 \times 10^{13} / 60 \times \text{EXP}(-15330.33 / (B1 + 273.15))$ |          |          |           |                                         |                                 |                      |                                  |
|--------------------------------------------------------------------------------------------|----------|----------|-----------|-----------------------------------------|---------------------------------|----------------------|----------------------------------|
| Column E formula = E3-D4                                                                   |          |          |           |                                         |                                 |                      |                                  |
| Column F formula = EXP(E3)                                                                 |          |          |           |                                         |                                 |                      |                                  |
| Column G formula = F3-F4                                                                   |          |          |           |                                         |                                 |                      |                                  |
| 1                                                                                          | A        | B        | C         | D                                       | E                               | F                    | G                                |
| 2                                                                                          | Time (s) | Temp (C) | Power (W) | $k_n = A \exp(E_a / RT_n)$ ( $s^{-1}$ ) | $\ln[A]_n = \ln[A]_{n-1} - k_n$ | $[A]_n$ ( $M^{-1}$ ) | $[A]_n - [A]_{n-1}$ ( $M^{-1}$ ) |
| 3                                                                                          | 0        |          |           |                                         | -2.302585093                    | 0.1                  |                                  |
| 4                                                                                          | 1        | 22       | 300       | 1.86938E-11                             | -2.302585093                    | 0.1                  | 1.86939E-12                      |
| 5                                                                                          | 2        | 22       | 300       | 1.86938E-11                             | -2.302585093                    | 0.1                  | 1.86939E-12                      |
| 6                                                                                          | 3        | 23       | 300       | 2.22775E-11                             | -2.302585093                    | 0.1                  | 2.22773E-12                      |
| 7                                                                                          | 4        | 26       | 300       | 3.74386E-11                             | -2.302585093                    | 0.1                  | 3.74384E-12                      |
| 8                                                                                          | 5        | 28       | 300       | 5.2617E-11                              | -2.302585093                    | 0.1                  | 5.26171E-12                      |
| 9                                                                                          | 6        | 33       | 300       | 1.20835E-10                             | -2.302585093                    | 0.1                  | 1.20835E-11                      |
| 10                                                                                         | 7        | 43       | 300       | 5.88934E-10                             | -2.302585094                    | 0.1                  | 5.88934E-11                      |
| 11                                                                                         | 8        | 49       | 300       | 1.45309E-09                             | -2.302585095                    | 0.1                  | 1.45309E-10                      |
| 12                                                                                         | 9        | 55       | 300       | 3.46876E-09                             | -2.302585099                    | 0.099999999          | 3.46876E-10                      |
| 13                                                                                         | 10       | 58       | 300       | 5.2964E-09                              | -2.302585104                    | 0.099999999          | 5.2964E-10                       |
| 14                                                                                         | 11       | 64       | 300       | 1.2072E-08                              | -2.302585116                    | 0.099999998          | 1.2072E-09                       |
| 15                                                                                         | 12       | 71       | 300       | 3.04399E-08                             | -2.302585147                    | 0.099999995          | 3.04399E-09                      |
| 16                                                                                         | 13       | 76       | 300       | 5.76084E-08                             | -2.302585204                    | 0.099999989          | 5.76084E-09                      |
| 17                                                                                         | 14       | 78       | 300       | 7.39765E-08                             | -2.302585278                    | 0.099999981          | 7.39765E-09                      |
| 18                                                                                         | 15       | 82       | 300       | 1.20959E-07                             | -2.302585399                    | 0.099999969          | 1.20959E-08                      |
| 19                                                                                         | 16       | 88       | 300       | 2.47793E-07                             | -2.302585647                    | 0.099999945          | 2.47793E-08                      |
| 20                                                                                         | 17       | 92       | 300       | 3.9449E-07                              | -2.302586041                    | 0.099999905          | 3.9449E-08                       |
| 21                                                                                         | 18       | 95       | 300       | 5.55413E-07                             | -2.302586597                    | 0.09999985           | 5.55413E-08                      |
| 22                                                                                         | 19       | 98       | 300       | 7.77668E-07                             | -2.302587374                    | 0.099999772          | 7.77667E-08                      |
| 23                                                                                         | 20       | 101      | 300       | 1.083E-06                               | -2.302588457                    | 0.099999664          | 1.083E-07                        |
| 24                                                                                         | 21       | 104      | 300       | 1.50029E-06                             | -2.302589958                    | 0.099999514          | 1.50028E-07                      |
| 25                                                                                         | 22       | 106      | 300       | 1.85906E-06                             | -2.302591817                    | 0.099999328          | 1.85905E-07                      |
| 26                                                                                         | 23       | 109      | 300       | 2.55356E-06                             | -2.30259437                     | 0.099999072          | 2.55354E-07                      |
| 27                                                                                         | 24       | 111      | 300       | 3.14667E-06                             | -2.302597517                    | 0.099998758          | 3.14663E-07                      |
| 28                                                                                         | 25       | 113      | 300       | 3.86915E-06                             | -2.302601386                    | 0.099998371          | 3.8691E-07                       |
| 29                                                                                         | 26       | 116      | 300       | 5.25453E-06                             | -2.302606641                    | 0.099997845          | 5.25443E-07                      |

|    |    |     |     |             |              |             |             |
|----|----|-----|-----|-------------|--------------|-------------|-------------|
| 30 | 27 | 118 | 300 | 6.42708E-06 | -2.302613068 | 0.099997203 | 6.42692E-07 |
| 31 | 28 | 120 | 300 | 7.84518E-06 | -2.302620913 | 0.099996418 | 7.84493E-07 |
| 32 | 29 | 122 | 300 | 9.55687E-06 | -2.30263047  | 0.099995462 | 9.55648E-07 |
| 33 | 30 | 124 | 300 | 1.16189E-05 | -2.302642089 | 0.099994301 | 1.16183E-06 |
| 34 | 31 | 126 | 300 | 1.40982E-05 | -2.302656187 | 0.099992891 | 1.40973E-06 |
| 35 | 32 | 128 | 300 | 1.70736E-05 | -2.302673261 | 0.099991184 | 1.70723E-06 |
| 36 | 33 | 130 | 300 | 2.06377E-05 | -2.302693898 | 0.09998912  | 2.06357E-06 |
| 37 | 34 | 131 | 0   | 2.26738E-05 | -2.302716572 | 0.099986853 | 2.26711E-06 |
| 38 | 35 | 133 | 0   | 2.73304E-05 | -2.302743903 | 0.09998412  | 2.73265E-06 |
| 39 | 36 | 135 | 0   | 3.28831E-05 | -2.302776786 | 0.099980833 | 3.28774E-06 |
| 40 | 37 | 135 | 0   | 3.28831E-05 | -2.302809669 | 0.099977545 | 3.28763E-06 |
| 41 | 38 | 136 | 0   | 3.60448E-05 | -2.302845714 | 0.099973941 | 3.6036E-06  |
| 42 | 39 | 136 | 0   | 3.60448E-05 | -2.302881758 | 0.099970338 | 3.60347E-06 |
| 43 | 40 | 135 | 0   | 3.28831E-05 | -2.302914642 | 0.099967051 | 3.28728E-06 |
| 44 | 41 | 134 | 0   | 2.99853E-05 | -2.302944627 | 0.099964053 | 2.9975E-06  |
| 45 | 42 | 133 | 0   | 2.73304E-05 | -2.302971957 | 0.099961321 | 2.73202E-06 |
| 46 | 43 | 132 | 0   | 2.48992E-05 | -2.302996856 | 0.099958832 | 2.48893E-06 |
| 47 | 44 | 131 | 0   | 2.26738E-05 | -2.30301953  | 0.099956566 | 2.26642E-06 |
| 48 | 45 | 129 | 0   | 1.87757E-05 | -2.303038306 | 0.099954689 | 1.87674E-06 |
| 49 | 46 | 127 | 0   | 1.55185E-05 | -2.303053825 | 0.099953138 | 1.55113E-06 |
| 50 | 47 | 125 | 0   | 1.28018E-05 | -2.303066626 | 0.099951858 | 1.27957E-06 |
| 51 | 48 | 124 | 0   | 1.16189E-05 | -2.303078245 | 0.099950697 | 1.16132E-06 |
| 52 | 49 | 122 | 0   | 9.55687E-06 | -2.303087802 | 0.099949742 | 9.55211E-07 |
| 53 | 50 | 120 | 0   | 7.84518E-06 | -2.303095647 | 0.099948958 | 7.8412E-07  |
| 54 | 51 | 119 | 0   | 7.10262E-06 | -2.30310275  | 0.099948248 | 7.09897E-07 |
| 55 | 52 | 117 | 0   | 5.81281E-06 | -2.303108563 | 0.099947667 | 5.80978E-07 |
| 56 | 53 | 115 | 0   | 4.74741E-06 | -2.30311331  | 0.099947192 | 4.74491E-07 |
| 57 | 54 | 114 | 0   | 4.28697E-06 | -2.303117597 | 0.099946764 | 4.2847E-07  |
| 58 | 55 | 112 | 0   | 3.4902E-06  | -2.303121087 | 0.099946415 | 3.48833E-07 |
| 59 | 56 | 111 | 0   | 3.14667E-06 | -2.303124234 | 0.0999461   | 3.14497E-07 |
| 60 | 57 | 110 | 0   | 2.83541E-06 | -2.303127069 | 0.099945817 | 2.83388E-07 |
| 61 | 58 | 108 | 0   | 2.29846E-06 | -2.303129368 | 0.099945587 | 2.29721E-07 |
| 62 | 59 | 107 | 0   | 2.06769E-06 | -2.303131435 | 0.099945381 | 2.06657E-07 |
| 63 | 60 | 105 | 0   | 1.67054E-06 | -2.303133106 | 0.099945214 | 1.66963E-07 |
| 64 | 61 | 104 | 0   | 1.50029E-06 | -2.303134606 | 0.099945064 | 1.49946E-07 |
| 65 | 62 | 102 | 0   | 1.20799E-06 | -2.303135814 | 0.099944943 | 1.20732E-07 |
| 66 | 63 | 101 | 0   | 1.083E-06   | -2.303136897 | 0.099944835 | 1.0824E-07  |
| 67 | 64 | 100 | 0   | 9.70378E-07 | -2.303137868 | 0.099944738 | 9.69842E-08 |
| 68 | 65 | 98  | 0   | 7.77668E-07 | -2.303138645 | 0.09994466  | 7.77238E-08 |
| 69 | 66 | 97  | 0   | 6.95555E-07 | -2.303139341 | 0.099944591 | 6.9517E-08  |
| 70 | 67 | 96  | 0   | 6.21736E-07 | -2.303139963 | 0.099944528 | 6.21392E-08 |
| 71 | 68 | 95  | 0   | 5.55413E-07 | -2.303140518 | 0.099944473 | 5.55105E-08 |
| 72 | 69 | 94  | 0   | 4.9586E-07  | -2.303141014 | 0.099944423 | 4.95585E-08 |
| 73 | 70 | 92  | 0   | 3.9449E-07  | -2.303141408 | 0.099944384 | 3.94271E-08 |
| 74 | 71 | 91  | 0   | 3.51532E-07 | -2.30314176  | 0.099944349 | 3.51337E-08 |

|     |     |    |   |             |              |             |             |
|-----|-----|----|---|-------------|--------------|-------------|-------------|
| 75  | 72  | 90 | 0 | 3.13054E-07 | -2.303142073 | 0.099944318 | 3.12879E-08 |
| 76  | 73  | 89 | 0 | 2.78608E-07 | -2.303142352 | 0.09994429  | 2.78453E-08 |
| 77  | 74  | 88 | 0 | 2.47793E-07 | -2.303142599 | 0.099944265 | 2.47655E-08 |
| 78  | 75  | 87 | 0 | 2.20243E-07 | -2.30314282  | 0.099944243 | 2.2012E-08  |
| 79  | 76  | 86 | 0 | 1.95627E-07 | -2.303143015 | 0.099944223 | 1.95518E-08 |
| 80  | 77  | 85 | 0 | 1.73648E-07 | -2.303143189 | 0.099944206 | 1.73551E-08 |
| 81  | 78  | 84 | 0 | 1.54035E-07 | -2.303143343 | 0.099944191 | 1.53949E-08 |
| 82  | 79  | 83 | 0 | 1.36545E-07 | -2.303143479 | 0.099944177 | 1.36469E-08 |
| 83  | 80  | 82 | 0 | 1.20959E-07 | -2.3031436   | 0.099944165 | 1.20892E-08 |
| 84  | 81  | 81 | 0 | 1.07079E-07 | -2.303143707 | 0.099944154 | 1.0702E-08  |
| 85  | 82  | 80 | 0 | 9.47265E-08 | -2.303143802 | 0.099944145 | 9.46736E-09 |
| 86  | 83  | 79 | 0 | 8.37404E-08 | -2.303143886 | 0.099944136 | 8.36936E-09 |
| 87  | 84  | 78 | 0 | 7.39765E-08 | -2.30314396  | 0.099944129 | 7.39352E-09 |
| 88  | 85  | 77 | 0 | 6.53048E-08 | -2.303144025 | 0.099944122 | 6.52683E-09 |
| 89  | 86  | 76 | 0 | 5.76084E-08 | -2.303144083 | 0.099944117 | 5.75762E-09 |
| 90  | 87  | 75 | 0 | 5.07825E-08 | -2.303144134 | 0.099944112 | 5.07541E-09 |
| 91  | 88  | 75 | 0 | 5.07825E-08 | -2.303144184 | 0.099944106 | 5.07541E-09 |
| 92  | 89  | 74 | 0 | 4.47329E-08 | -2.303144229 | 0.099944102 | 4.47079E-09 |
| 93  | 90  | 73 | 0 | 3.9375E-08  | -2.303144269 | 0.099944098 | 3.9353E-09  |
| 94  | 91  | 72 | 0 | 3.46333E-08 | -2.303144303 | 0.099944095 | 3.4614E-09  |
| 95  | 92  | 71 | 0 | 3.04399E-08 | -2.303144334 | 0.099944092 | 3.04229E-09 |
| 96  | 93  | 71 | 0 | 3.04399E-08 | -2.303144364 | 0.099944089 | 3.04229E-09 |
| 97  | 94  | 70 | 0 | 2.67342E-08 | -2.303144391 | 0.099944086 | 2.67192E-09 |
| 98  | 95  | 69 | 0 | 2.34617E-08 | -2.303144414 | 0.099944084 | 2.34486E-09 |
| 99  | 96  | 68 | 0 | 2.05741E-08 | -2.303144435 | 0.099944081 | 2.05626E-09 |
| 100 | 97  | 68 | 0 | 2.05741E-08 | -2.303144455 | 0.099944079 | 2.05626E-09 |
| 101 | 98  | 67 | 0 | 1.80279E-08 | -2.303144473 | 0.099944078 | 1.80178E-09 |
| 102 | 99  | 66 | 0 | 1.57846E-08 | -2.303144489 | 0.099944076 | 1.57757E-09 |
| 103 | 100 | 66 | 0 | 1.57846E-08 | -2.303144505 | 0.099944074 | 1.57757E-09 |
| 104 | 101 | 65 | 0 | 1.38095E-08 | -2.303144519 | 0.099944073 | 1.38018E-09 |
| 105 | 102 | 64 | 0 | 1.2072E-08  | -2.303144531 | 0.099944072 | 1.20653E-09 |
| 106 | 103 | 64 | 0 | 1.2072E-08  | -2.303144543 | 0.099944071 | 1.20653E-09 |
| 107 | 104 | 63 | 0 | 1.05447E-08 | -2.303144553 | 0.09994407  | 1.05388E-09 |
| 108 | 105 | 62 | 0 | 9.20316E-09 | -2.303144563 | 0.099944069 | 9.19801E-10 |
| 109 | 106 | 62 | 0 | 9.20316E-09 | -2.303144572 | 0.099944068 | 9.19801E-10 |
| 110 | 107 | 61 | 0 | 8.02576E-09 | -2.30314458  | 0.099944067 | 8.02128E-10 |
| 111 | 108 | 60 | 0 | 6.99325E-09 | -2.303144587 | 0.099944066 | 6.98934E-10 |
| 112 | 109 | 60 | 0 | 6.99325E-09 | -2.303144594 | 0.099944066 | 6.98934E-10 |
| 113 | 110 | 59 | 0 | 6.08852E-09 | -2.3031446   | 0.099944065 | 6.08511E-10 |
| 114 | 111 | 59 | 0 | 6.08852E-09 | -2.303144606 | 0.099944064 | 6.08511E-10 |
| 115 | 112 | 58 | 0 | 5.2964E-09  | -2.303144611 | 0.099944064 | 5.29344E-10 |
| 116 | 113 | 58 | 0 | 5.2964E-09  | -2.303144617 | 0.099944063 | 5.29344E-10 |
| 117 | 114 | 57 | 0 | 4.60345E-09 | -2.303144621 | 0.099944063 | 4.60087E-10 |
| 118 | 115 | 56 | 0 | 3.99775E-09 | -2.303144625 | 0.099944062 | 3.99551E-10 |
| 119 | 116 | 56 | 0 | 3.99775E-09 | -2.303144629 | 0.099944062 | 3.99551E-10 |

|     |     |    |   |             |              |             |             |
|-----|-----|----|---|-------------|--------------|-------------|-------------|
| 120 | 117 | 55 | 0 | 3.46876E-09 | -2.303144633 | 0.099944062 | 3.46682E-10 |
| 121 | 118 | 55 | 0 | 3.46876E-09 | -2.303144636 | 0.099944061 | 3.46682E-10 |
| 122 | 119 | 54 | 0 | 3.00716E-09 | -2.303144639 | 0.099944061 | 3.00548E-10 |
| 123 | 120 | 54 | 0 | 3.00716E-09 | -2.303144642 | 0.099944061 | 3.00548E-10 |
| 124 | 121 | 53 | 0 | 2.60471E-09 | -2.303144645 | 0.09994406  | 2.60325E-10 |
| 125 | 122 | 53 | 0 | 2.60471E-09 | -2.303144647 | 0.09994406  | 2.60325E-10 |
| 126 | 123 | 52 | 0 | 2.25412E-09 | -2.30314465  | 0.09994406  | 2.25286E-10 |
| 127 | 124 | 52 | 0 | 2.25412E-09 | -2.303144652 | 0.09994406  | 2.25286E-10 |
| 128 | 125 | 52 | 0 | 2.25412E-09 | -2.303144654 | 0.09994406  | 2.25286E-10 |
| 129 | 126 | 51 | 0 | 1.94898E-09 | -2.303144656 | 0.099944059 | 1.94789E-10 |
| 130 | 127 | 51 | 0 | 1.94898E-09 | -2.303144658 | 0.099944059 | 1.94789E-10 |
| 131 | 128 | 50 | 0 | 1.68363E-09 | -2.30314466  | 0.099944059 | 1.68269E-10 |
| 132 | 129 | 50 | 0 | 1.68363E-09 | -2.303144661 | 0.099944059 | 1.68269E-10 |
| 133 | 130 | 50 | 0 | 1.68363E-09 | -2.303144663 | 0.099944059 | 1.68269E-10 |

### Determining $k_{eff}/k_{CH}$ and $k_{MW}/k_{CH}$

$$\ln(1 - 0.01x) = -kt = -Ae^{-E_a/RT}t$$

$$T_{eff} = \frac{-E_a}{A. t. R. \ln[-\ln(1 - 0.01x)]}$$

$$\frac{k_{eff}}{k_{CH}} = \frac{\ln(1 - 0.01x_{actual})}{\ln(1 - 0.01x_{predicted})}$$

All the small conversions for each second of the experiments were sorted based on whether or not the power is on. For example, the calculated conversions over the first 33 seconds in Table S5 are obtained when the power is on (i.e. heating) and the ones from 34 seconds until 130 seconds are related to the cooling time.

total conversion

$$= \text{sum of conversions with power on} + \text{sum of conversions with power off}$$

$$= x_{on} + x_{off}$$

$$\ln(1 - 0.01x_{off}) = -\sum_{off} Ae^{-E_a/RT_c}; T_c = \text{cooling temperatures}$$

$$x_{on} = x_{overall} - x_{off}$$

$$\frac{k_{MW}}{k_{CH}} = \frac{\ln(1 - 0.01x_{on})}{\ln(1 - 0.01x_{predicted})}$$

$$\ln(1 - 0.01x_{predicted}) = -\sum_{on} Ae^{-E_a/RT_h}; T_h = \text{heating temperatures}$$

**Table S8.** Results of microwave pulsed heating experiments under open vessel condition

| Entry | Temp. Range (°C) | Power (W) | Duration (mins) | Number of Cycles | Min-Max Temp (°C) | Ave Temp (°C) | Actual yield (%) | Predicted yield (%) | rate enhancement (%) | $k_{eff}/k_{CH}$ | $k_{MW}/k_{CH}$ |       |
|-------|------------------|-----------|-----------------|------------------|-------------------|---------------|------------------|---------------------|----------------------|------------------|-----------------|-------|
| 1     | a                | 50-130    | 300             | 1256             | 300               | 49 - 134      | 84.76            | 22.21               | 20.59                | 1.62             | 1.089           | 1.341 |
|       | b                | 50-130    | 300             | 1267             | 300               | 49 - 134      | 84.66            | 22.03               | 20.69                | 1.34             | 1.074           | 1.283 |
|       | c                | 50-130    | 300             | 1213             | 300               | 49 - 134      | 84.81            | 21.52               | 20.15                | 1.37             | 1.077           | 1.294 |

**Figure S8.** Long-neck round-bottom flask used for open vessel experiments: a) The fiber optic setup inside the flask, b) the flask inside the microwave cavity

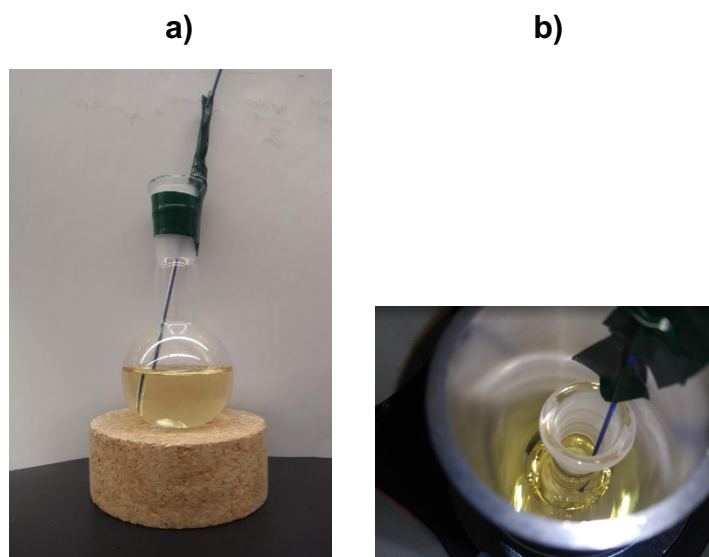



**Table S9. Fixed power microwave experiments:**

| Entry |   | Power (W) | Power Max | Duration (mins) | Max Temp (°C) | Steady State Temp (°C) | Ave Temp (°C) | Actual yield (%) | Predicted yield (%) | Actual – Predicted (%) | $k_{eff}/k_{CH}$ |
|-------|---|-----------|-----------|-----------------|---------------|------------------------|---------------|------------------|---------------------|------------------------|------------------|
| 1     | a | 145       | on        | 300             | 130           | 127                    | 126.30        | 28.71            | 24.67               | 4.04                   | 1.194            |
|       | b | 145       | on        | 300             | 128           | 126                    | 125.10        | 28.48            | 22.45               | 6.03                   | 1.318            |
| 2     | a | 170       | on        | 300             | 135           | 133                    | 132.88        | 47.14            | 40.93               | 6.21                   | 1.211            |
| 3     | a | 200       | on        | 300             | 146           | 145                    | 143.52        | 79.38            | 74.81               | 4.57                   | 1.145            |
| 4     | a | 250       | on        | 120             | 160           | 160                    | 154.49        | 86.40            | 82.10               | 4.30                   | 1.160            |
| 5     | a | 62        | off       | 120             | 161           | 160                    | 156.15        | 87.92            | 84.51               | 3.41                   | 1.133            |
| 6     | a | 69        | off       | 60              | 167           | 167                    | 158.63        | 78.14            | 77.05               | 1.09                   | 1.033            |
